# Supplementary material for: Water–carbon disulfide dimers: observation of a new isomer and ab initio structure theory
Source: Royal Society of Chemistry journal article supplement (doi:10.1039/d4cp02281e), 2024-01-01
Supplement: d4cp02281e1.pdf [file d4cp02281e1.pdf]

## **Water-carbon disulfide dimers: observation of a new isomer, determination of an $A$ rotational constant for the known isomer, and ab initio structure theory**

A. J. Barclay,<sup>1</sup>A. R. W. McKellar,<sup>2</sup>A. Pietropolli Charmet,<sup>3</sup>and N. Moazzen-Ahmadi<sup>1</sup>

<sup>1</sup>*Department of Physics and Astronomy, University of Calgary, 2500 University Drive North West, Calgary, Alberta T2N 1N4, Canada*

<sup>2</sup>*National Research Council of Canada, Ottawa, Ontario K1A 0R6, Canada*

<sup>3</sup>*Dipartimento di Scienze Molecolari e Nanosistemi, Università Ca' Foscari Venezia, Via Torino 155, I-30172, Mestre, Venezia, Italy*

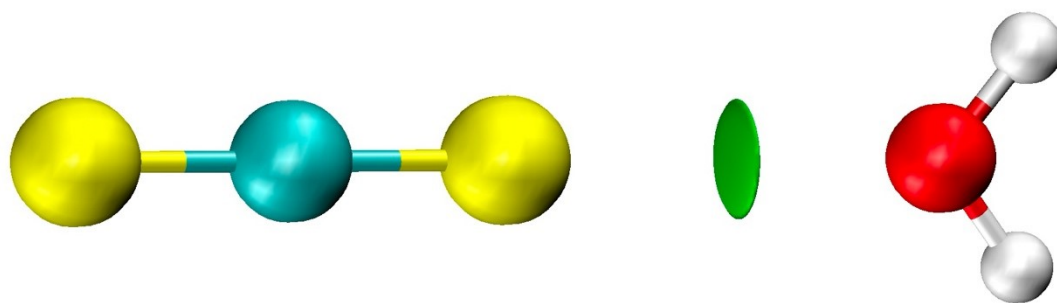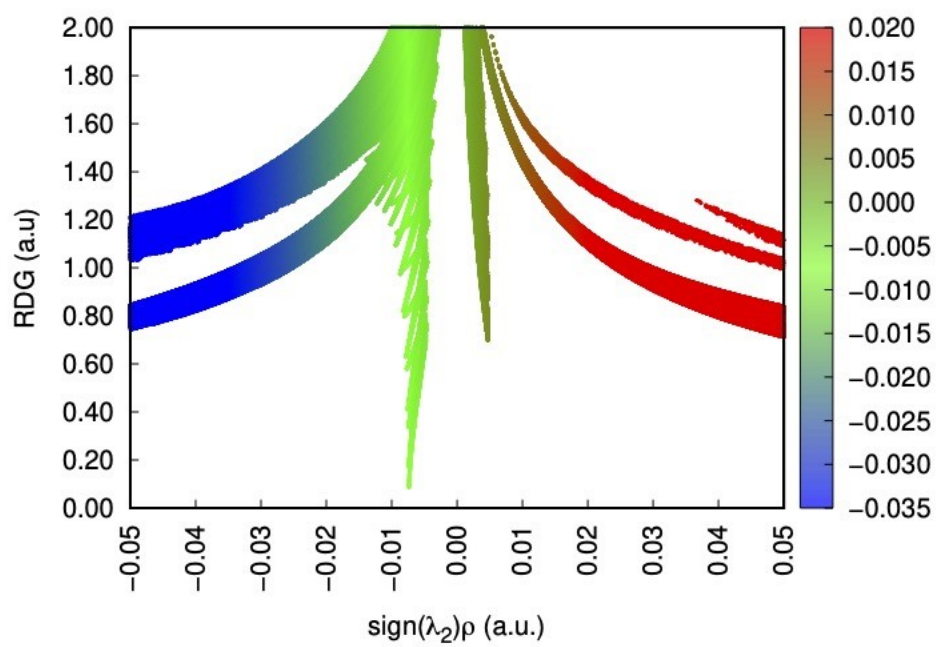

Figure S1. NCI and RDG scatter plots of Isomer 1.

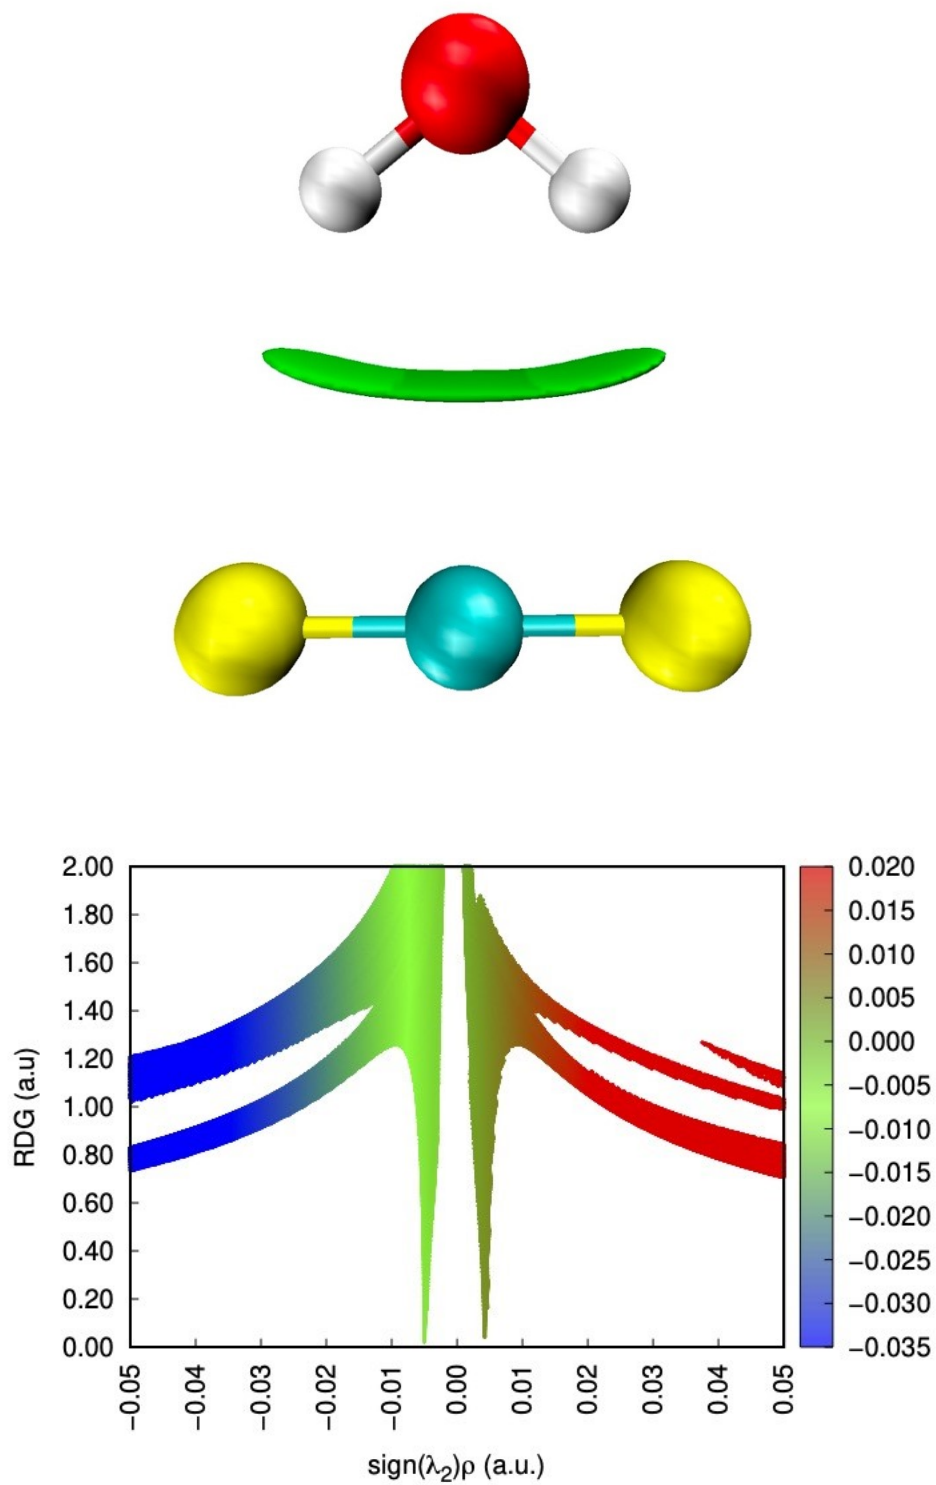

Figure S2. NCI and RDG scatter plots of Isomer 2.

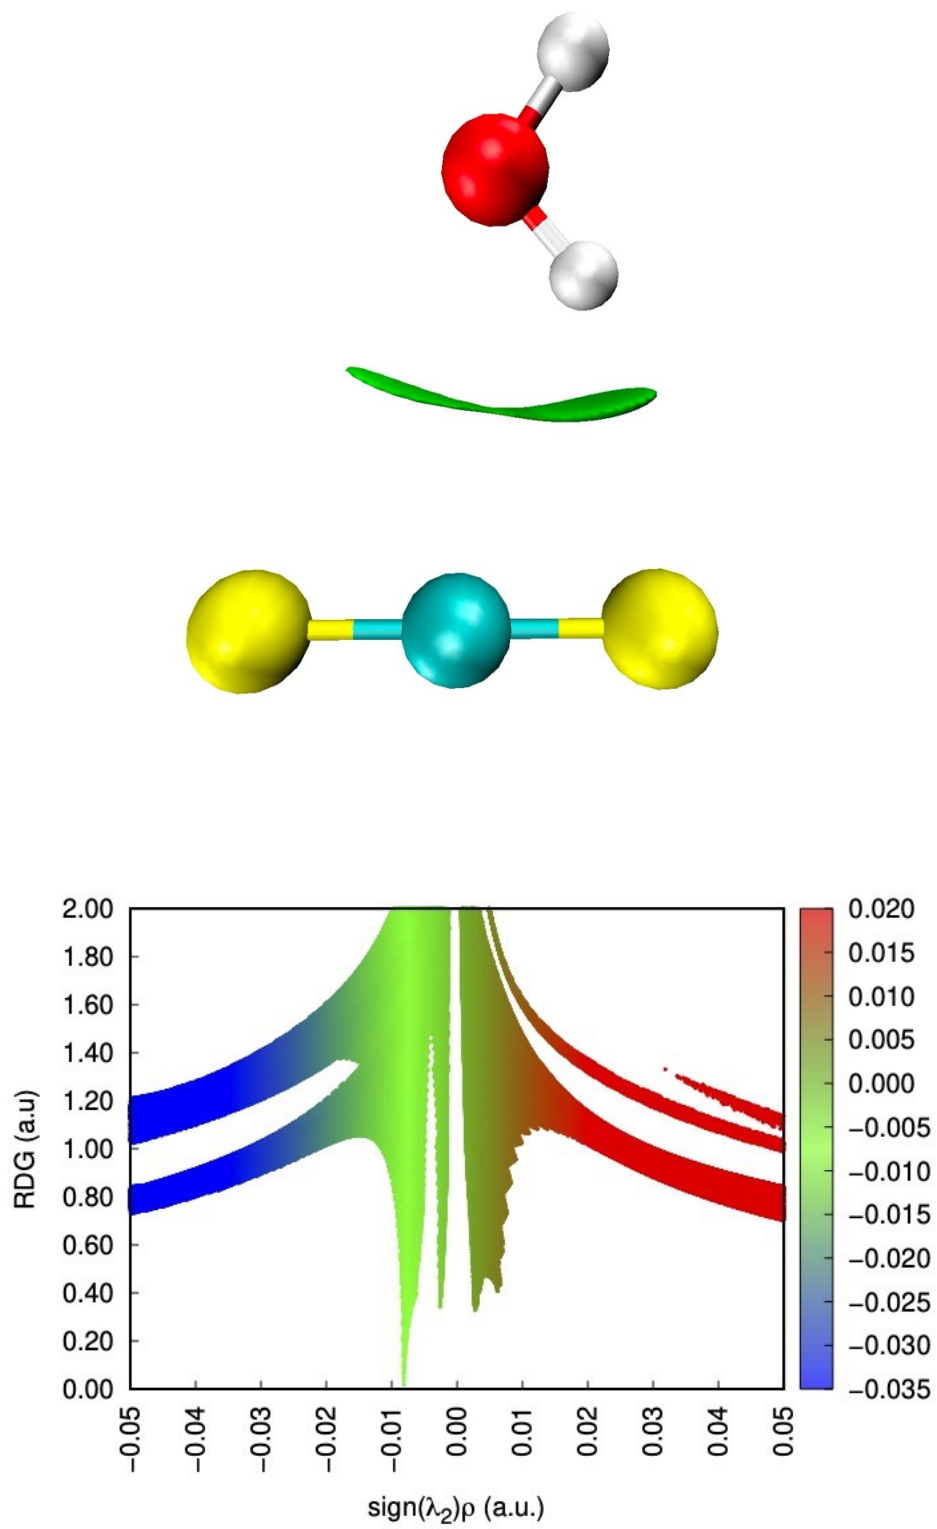

Figure S3. NCI and RDG scatter plots of Isomer 3

Table S1. Structural data of isomer 1.

-----  
 Geometry optimized at revDSD-PBEP86-D3BJ/jun-cc-pVT(+d)Z level.

|   | (Angstrom) |           |           |
|---|------------|-----------|-----------|
| C | 0.000000   | 0.000000  | 1.006606  |
| S | 0.000000   | 0.000000  | 2.567634  |
| S | 0.000000   | -0.000000 | -0.550619 |
| O | 0.000000   | -0.000000 | -3.713570 |
| H | -0.000000  | 0.760420  | -4.301659 |
| H | -0.000000  | -0.760420 | -4.301659 |

-----  
 Geometry optimized at CCSD(T)-F12b/cc-pVTZ-F12 level.

|   | (Angstrom)   |               |               |
|---|--------------|---------------|---------------|
| C | 0.0000000000 | 0.0000000000  | 1.0044270350  |
| S | 0.0000000000 | 0.0000000000  | 2.5645890828  |
| S | 0.0000000000 | 0.0000000000  | -0.5516364522 |
| O | 0.0000000000 | 0.0000000000  | -3.7065978688 |
| H | 0.0000000000 | -0.7583404431 | -4.2935801385 |
| H | 0.0000000000 | 0.7583404431  | -4.2935801385 |

-----  
 Geometry optimized at CCSD(T)-F12b/cc-pVQZ-F12 level.

|   | (Angstrom)   |               |               |
|---|--------------|---------------|---------------|
| C | 0.0000000000 | 0.0000000000  | 1.0017178544  |
| S | 0.0000000000 | 0.0000000000  | 2.5611720153  |
| S | 0.0000000000 | 0.0000000000  | -0.5535716694 |
| O | 0.0000000000 | 0.0000000000  | -3.7042969990 |
| H | 0.0000000000 | -0.7583829118 | -4.2906998407 |
| H | 0.0000000000 | 0.7583829118  | -4.2906998407 |

-----

Table S2. Structural data of isomer 2.

-----  
 Geometry optimized at revDSD-PBEP86-D3BJ/jun-cc-pVT(+d)Z level.

|   | (Angstrom) |           |           |
|---|------------|-----------|-----------|
| C | 0.000000   | -0.000000 | -0.715760 |
| S | 0.000000   | 1.557955  | -0.712218 |
| S | -0.000000  | -1.557955 | -0.712218 |
| O | 0.000000   | 0.000000  | 2.826902  |
| H | 0.000000   | 0.758173  | 2.235163  |
| H | -0.000000  | -0.758173 | 2.235163  |

-----  
 Geometry optimized at CCSD(T)-F12b/cc-pVTZ-F12 level.

|   | (Angstrom)   |               |               |
|---|--------------|---------------|---------------|
| C | 0.0000000000 | 0.0000000000  | -0.7087054943 |
| S | 0.0000000000 | 1.5570479117  | -0.7039350107 |
| S | 0.0000000000 | -1.5570479117 | -0.7039350107 |
| O | 0.0000000000 | 0.0000000000  | 2.8014614911  |
| H | 0.0000000000 | 0.7561112472  | 2.2105823673  |
| H | 0.0000000000 | -0.7561112472 | 2.2105823673  |

-----  
 Geometry optimized at CCSD(T)-F12b/cc-pVQZ-F12 level.

|   | (Angstrom)   |               |               |
|---|--------------|---------------|---------------|
| C | 0.0000000000 | 0.0000000000  | -0.7126922287 |
| S | 0.0000000000 | 1.5562690903  | -0.7079099248 |
| S | 0.0000000000 | -1.5562690903 | -0.7079099248 |
| O | 0.0000000000 | 0.0000000000  | 2.8049508268  |
| H | 0.0000000000 | 0.7562747062  | 2.2148059808  |
| H | 0.0000000000 | -0.7562747062 | 2.2148059808  |

-----

Table S3. Structural data of isomer 3.

---

Geometry optimized at revDSD-PBEP86-D3BJ/jun-cc-pVT(+d)Z level.

(Angstrom)

|   |           |           |          |
|---|-----------|-----------|----------|
| C | -0.000000 | 0.715495  | 0.000000 |
| S | -1.542765 | 0.887474  | 0.000000 |
| S | 1.552885  | 0.536411  | 0.000000 |
| O | -0.131746 | -2.685214 | 0.000000 |
| H | 0.591469  | -2.049874 | 0.000000 |
| H | 0.300577  | -3.543545 | 0.000000 |

---

Geometry optimized at CCSD(T)-F12b/cc-pVTZ-F12 level.

(Angstrom)

|   |               |               |              |
|---|---------------|---------------|--------------|
| C | 0.6651810480  | 0.2474818962  | 0.0000000000 |
| S | 1.3400731495  | -1.1492453678 | 0.0000000000 |
| S | -0.0218612529 | 1.6508171773  | 0.0000000000 |
| O | -2.4530481662 | -1.0514182065 | 0.0000000000 |
| H | -2.1202823018 | -0.1505344879 | 0.0000000000 |
| H | -3.4070282767 | -0.9548622413 | 0.0000000000 |

---

Table S4. Harmonic Frequencies and Intensities for the CS<sub>2</sub>-D<sub>2</sub>O isomers.<sup>a</sup>

| Isomer 1        |           | Isomer 2        |           | Isomer 3        |           |
|-----------------|-----------|-----------------|-----------|-----------------|-----------|
| Frequency       | Intensity | Frequency       | Intensity | Frequency       | Intensity |
| 2883.6 [2885.9] | 39.4      | 2873.8 [2874.2] | 11.8      | 2873.7 [2875.8] | 70.9      |
| 2754.4 [2760.5] | 6.8       | 2749.8 [2753.3] | 12.1      | 2743.8 [2749.8] | 8.6       |
| 1566.6 [1552.7] | 690.1     | 1572.2 [1557.7] | 621.2     | 1573.7 [1559.4] | 636.4     |
| 1203.9 [1208.2] | 43.0      | 1205.1 [1208.0] | 72.2      | 1202.7 [1207.5] | 38.2      |
| 671.0 [669.3]   | 1.0       | 673.5 [671.6]   | 0.0       | 673.6 [671.7]   | 0.3       |
| 409.0 [404.9]   | 4.5       | 405.7 [402.8]   | 3.7       | 403.6 [400.1]   | 4.8       |
| 407.6 [403.7]   | 4.0       | 398.1 [395.0]   | 4.0       | 398.3 [395.2]   | 4.0       |
| 78.0 [80.6]     | 27.8      | 97.6 [105.3]    | 91.3      | 124.2 [125.6]   | 34.5      |
| 72.4 [73.8]     | 0.8       | 75.5 [81.8]     | 32.0      | 101.7 [107.5]   | 54.3      |
| 52.2 [47.8]     | 114.5     | 68.1 [71.2]     | 0.2       | 69.9 [69.7]     | 6.6       |
| 25.3 [25.5]     | 10.7      | 63.3 [70.0]     | 0.0       | 30.5 [37.5]     | 5.4       |
| 19.8 [22.8]     | 6.0       | 25.8 [31.7]     | 11.9      | 26.8 [21.3]     | 71.2      |

<sup>a</sup> Frequencies (in cm<sup>-1</sup>) and intensities (in km/mol) are computed at revDSD level of theory; between square parentheses are reported the corresponding frequency data obtained by CCSD(T)-F12b calculations.



Table S5. Observed and fitted line positions of CS<sub>2</sub>-D<sub>2</sub>O (cm<sup>-1</sup>).

Note: Blank Kc values indicate an unresolved asymmetry doublet, where Calc equals the mean of the calculated doublet line positions.

```

*****
J'   Ka'  Kc'   J''  Ka'' Kc''   Obs       Calc      Obs-Calc
*****
12   0    12   13   0    13   2667.7709 2667.7709 0.0000
10   0    10   11   0    11   2667.8978 2667.8976 0.0002
9    0    9    10   0    10   2667.9611 2667.9609 0.0001
7    1    8    8    1    8    2667.9948 2667.9944 0.0005
8    0    8    9    0    9    2668.0245 2668.0244 0.0001
6    1    7    7    1    7    2668.0581 2668.0579 0.0002
7    0    7    8    0    8    2668.0881 2668.0879 0.0003
5    1    6    6    1    6    2668.1219 2668.1215 0.0004
6    0    6    7    0    7    2668.1516 2668.1514 0.0003
5    0    5    6    0    6    2668.2152 2668.2149 0.0003
3    1    4    4    1    4    2668.2492 2668.2488 0.0005
4    0    4    5    0    5    2668.2789 2668.2785 0.0004
2    1    3    3    1    3    2668.3130 2668.3125 0.0005
3    0    3    4    0    4    2668.3424 2668.3422 0.0002
1    1    2    2    1    2    2668.3762 2668.3762 0.0000
2    0    2    3    0    3    2668.4060 2668.4059 0.0001
1    0    1    2    0    2    2668.4696 2668.4696 0.0000
0    0    0    1    0    1    2668.5332 2668.5334 -0.0002
2    1    1    1    1    0    2668.6310 2668.6313 -0.0003
1    0    1    0    0    0    2668.6609 2668.6610 -0.0001
3    1    2    2    1    1    2668.6948 2668.6952 -0.0004
2    0    2    1    0    1    2668.7247 2668.7249 -0.0002
4    1    3    3    1    2    2668.7586 2668.7591 -0.0005
3    0    3    2    0    2    2668.7887 2668.7888 -0.0001
5    1    4    4    1    3    2668.8226 2668.8230 -0.0005
4    0    4    3    0    3    2668.8528 2668.8528 0.0000
6    1    5    5    1    4    2668.8869 2668.8870 -0.0001
5    0    5    4    0    4    2668.9164 2668.9168 -0.0004
7    1    6    6    1    5    2668.9508 2668.9509 -0.0001
6    0    6    5    0    5    2668.9807 2668.9808 -0.0001
8    1    7    7    1    6    2669.0149 2669.0149 0.0000
7    0    7    6    0    6    2669.0447 2669.0449 -0.0002
9    1    8    8    1    7    2669.0786 2669.0789 -0.0003
8    0    8    7    0    7    2669.1088 2669.1090 -0.0001
10   1    9    9    1    8    2669.1431 2669.1430 0.0001
9    0    9    8    0    8    2669.1729 2669.1731 -0.0002
10   0    10   9    0    9    2669.2371 2669.2373 -0.0001
11   0    11   10   0    10   2669.3014 2669.3015 -0.0001
12   0    12   11   0    11   2669.3658 2669.3657 0.0000
13   0    13   12   0    12   2669.4301 2669.4300 0.0001
14   0    14   13   0    13   2669.4942 2669.4943 -0.0001

9    0    9    10   1    10   2775.8845 2775.8842 0.0003
8    0    8    9    1    9    2775.9459 2775.9460 -0.0001
7    0    7    8    1    8    2776.0081 2776.0080 0.0001

```

|    |   |    |    |   |    |           |           |         |
|----|---|----|----|---|----|-----------|-----------|---------|
| 6  | 0 | 6  | 7  | 1 | 7  | 2776.0702 | 2776.0702 | -0.0001 |
| 5  | 0 | 5  | 6  | 1 | 6  | 2776.1328 | 2776.1327 | 0.0001  |
| 4  | 0 | 4  | 5  | 1 | 5  | 2776.1955 | 2776.1953 | 0.0002  |
| 3  | 0 | 3  | 4  | 1 | 4  | 2776.2582 | 2776.2582 | 0.0000  |
| 2  | 0 | 2  | 3  | 1 | 3  | 2776.3213 | 2776.3213 | 0.0000  |
| 1  | 0 | 1  | 2  | 1 | 2  | 2776.3847 | 2776.3845 | 0.0001  |
| 0  | 0 | 0  | 1  | 1 | 1  | 2776.4479 | 2776.4480 | -0.0001 |
| 2  | 0 | 2  | 1  | 1 | 1  | 2776.6401 | 2776.6397 | 0.0004  |
| 3  | 0 | 3  | 2  | 1 | 2  | 2776.7038 | 2776.7039 | -0.0001 |
| 4  | 0 | 4  | 3  | 1 | 3  | 2776.7684 | 2776.7684 | 0.0000  |
| 5  | 0 | 5  | 4  | 1 | 4  | 2776.8329 | 2776.8331 | -0.0002 |
| 6  | 0 | 6  | 5  | 1 | 5  | 2776.8976 | 2776.8980 | -0.0005 |
| 7  | 0 | 7  | 6  | 1 | 6  | 2776.9627 | 2776.9631 | -0.0004 |
| 8  | 0 | 8  | 7  | 1 | 7  | 2777.0282 | 2777.0284 | -0.0002 |
| 9  | 0 | 9  | 8  | 1 | 8  | 2777.0940 | 2777.0939 | 0.0000  |
| 10 | 0 | 10 | 9  | 1 | 9  | 2777.1598 | 2777.1596 | 0.0002  |
| 15 | 1 | 15 | 16 | 0 | 16 | 2790.1804 | 2790.1805 | -0.0001 |
| 14 | 1 | 14 | 15 | 0 | 15 | 2790.2459 | 2790.2458 | 0.0000  |
| 13 | 1 | 13 | 14 | 0 | 14 | 2790.3110 | 2790.3111 | -0.0001 |
| 12 | 1 | 12 | 13 | 0 | 13 | 2790.3763 | 2790.3762 | 0.0001  |
| 11 | 1 | 11 | 12 | 0 | 12 | 2790.4412 | 2790.4413 | -0.0001 |
| 10 | 1 | 10 | 11 | 0 | 11 | 2790.5061 | 2790.5062 | -0.0001 |
| 9  | 1 | 9  | 10 | 0 | 10 | 2790.5709 | 2790.5711 | -0.0002 |
| 8  | 1 | 8  | 9  | 0 | 9  | 2790.6358 | 2790.6358 | 0.0000  |
| 7  | 1 | 7  | 8  | 0 | 8  | 2790.7004 | 2790.7005 | -0.0001 |
| 6  | 1 | 6  | 7  | 0 | 7  | 2790.7649 | 2790.7650 | -0.0001 |
| 5  | 1 | 5  | 6  | 0 | 6  | 2790.8294 | 2790.8294 | -0.0001 |
| 3  | 1 | 3  | 4  | 0 | 4  | 2790.9579 | 2790.9580 | -0.0001 |
| 2  | 1 | 2  | 3  | 0 | 3  | 2791.0223 | 2791.0221 | 0.0002  |
| 1  | 1 | 1  | 2  | 0 | 2  | 2791.0861 | 2791.0861 | -0.0001 |
| 1  | 1 | 1  | 0  | 0 | 0  | 2791.2777 | 2791.2776 | 0.0002  |
| 2  | 1 | 2  | 1  | 0 | 1  | 2791.3411 | 2791.3412 | 0.0000  |
| 4  | 1 | 4  | 3  | 0 | 3  | 2791.4681 | 2791.4680 | 0.0001  |
| 5  | 1 | 5  | 4  | 0 | 4  | 2791.5314 | 2791.5313 | 0.0001  |
| 6  | 1 | 6  | 5  | 0 | 5  | 2791.5945 | 2791.5944 | 0.0001  |
| 7  | 1 | 7  | 6  | 0 | 6  | 2791.6576 | 2791.6575 | 0.0002  |
| 8  | 1 | 8  | 7  | 0 | 7  | 2791.7206 | 2791.7204 | 0.0001  |
| 9  | 1 | 9  | 8  | 0 | 8  | 2791.7833 | 2791.7832 | 0.0000  |
| 10 | 1 | 10 | 9  | 0 | 9  | 2791.8459 | 2791.8460 | 0.0000  |
| 11 | 1 | 11 | 10 | 0 | 10 | 2791.9086 | 2791.9086 | 0.0000  |
| 12 | 1 | 12 | 11 | 0 | 11 | 2791.9710 | 2791.9711 | 0.0000  |
| 13 | 1 | 13 | 12 | 0 | 12 | 2792.0334 | 2792.0334 | 0.0000  |
| 14 | 1 | 14 | 13 | 0 | 13 | 2792.0957 | 2792.0957 | 0.0000  |
| 15 | 1 | 15 | 14 | 0 | 14 | 2792.1579 | 2792.1578 | 0.0000  |
| 16 | 1 | 16 | 15 | 0 | 15 | 2792.2199 | 2792.2199 | 0.0001  |
| 17 | 1 | 17 | 16 | 0 | 16 | 2792.2815 | 2792.2818 | -0.0003 |
| 18 | 1 | 18 | 17 | 0 | 17 | 2792.3440 | 2792.3436 | 0.0004  |
| 3  | 2 |    | 4  | 1 |    | 2805.4686 | 2805.4681 | 0.0005  |
| 2  | 2 |    | 1  | 1 |    | 2805.8509 | 2805.8509 | 0.0000  |
| 3  | 2 |    | 2  | 1 |    | 2805.9145 | 2805.9145 | 0.0000  |
| 4  | 2 |    | 3  | 1 |    | 2805.9779 | 2805.9781 | -0.0002 |
| 5  | 2 |    | 4  | 1 |    | 2806.0414 | 2806.0417 | -0.0003 |
| 7  | 2 | 6  | 6  | 1 | 5  | 2806.1669 | 2806.1667 | 0.0002  |
| 7  | 2 | 5  | 6  | 1 | 6  | 2806.1704 | 2806.1707 | -0.0003 |

|    |   |    |    |   |    |           |           |         |
|----|---|----|----|---|----|-----------|-----------|---------|
| 8  | 2 | 7  | 7  | 1 | 6  | 2806.2296 | 2806.2295 | 0.0001  |
| 8  | 2 | 6  | 7  | 1 | 7  | 2806.2349 | 2806.2349 | 0.0000  |
| 9  | 2 | 8  | 8  | 1 | 7  | 2806.2918 | 2806.2921 | -0.0004 |
| 9  | 2 | 7  | 8  | 1 | 8  | 2806.2991 | 2806.2990 | 0.0001  |
| 10 | 2 | 9  | 9  | 1 | 8  | 2806.3545 | 2806.3546 | -0.0001 |
| 10 | 2 | 8  | 9  | 1 | 9  | 2806.3636 | 2806.3632 | 0.0003  |
| 1  | 0 | 1  | 0  | 0 | 0  | 2176.8932 | 2176.8931 | 0.0002  |
| 2  | 0 | 2  | 1  | 0 | 1  | 2176.9562 | 2176.9565 | -0.0002 |
| 0  | 0 | 0  | 1  | 0 | 1  | 2176.7658 | 2176.7656 | 0.0001  |
| 2  | 0 | 2  | 3  | 0 | 3  | 2176.6376 | 2176.6375 | 0.0001  |
| 1  | 0 | 1  | 2  | 0 | 2  | 2176.7017 | 2176.7016 | 0.0001  |
| 3  | 0 | 3  | 4  | 0 | 4  | 2176.5732 | 2176.5731 | 0.0001  |
| 4  | 0 | 4  | 5  | 0 | 5  | 2176.5086 | 2176.5085 | 0.0001  |
| 5  | 0 | 5  | 6  | 0 | 6  | 2176.4439 | 2176.4438 | 0.0001  |
| 6  | 0 | 6  | 7  | 0 | 7  | 2176.3790 | 2176.3789 | 0.0001  |
| 7  | 0 | 7  | 8  | 0 | 8  | 2176.3139 | 2176.3137 | 0.0001  |
| 9  | 0 | 9  | 10 | 0 | 10 | 2176.1832 | 2176.1830 | 0.0003  |
| 3  | 0 | 3  | 2  | 0 | 2  | 2177.0196 | 2177.0197 | -0.0002 |
| 4  | 0 | 4  | 3  | 0 | 3  | 2177.0825 | 2177.0828 | -0.0003 |
| 5  | 0 | 5  | 4  | 0 | 4  | 2177.1455 | 2177.1456 | -0.0001 |
| 6  | 0 | 6  | 5  | 0 | 5  | 2177.2081 | 2177.2083 | -0.0001 |
| 7  | 0 | 7  | 6  | 0 | 6  | 2177.2706 | 2177.2708 | -0.0001 |
| 8  | 0 | 8  | 7  | 0 | 7  | 2177.3330 | 2177.3330 | -0.0001 |
| 9  | 0 | 9  | 8  | 0 | 8  | 2177.3952 | 2177.3951 | 0.0000  |
| 10 | 0 | 10 | 9  | 0 | 9  | 2177.4570 | 2177.4570 | -0.0001 |
| 11 | 0 | 11 | 10 | 0 | 10 | 2177.5190 | 2177.5187 | 0.0003  |
| 12 | 0 | 12 | 11 | 0 | 11 | 2177.5803 | 2177.5802 | 0.0000  |
| 10 | 0 | 10 | 11 | 0 | 11 | 2176.1170 | 2176.1173 | -0.0003 |
| 11 | 0 | 11 | 12 | 0 | 12 | 2176.0513 | 2176.0514 | -0.0001 |
| 1  | 1 |    | 2  | 1 |    | 2176.6939 | 2176.6942 | -0.0003 |
| 2  | 1 |    | 3  | 1 |    | 2176.6303 | 2176.6300 | 0.0003  |
| 3  | 1 |    | 4  | 1 |    | 2176.5663 | 2176.5657 | 0.0006  |
| 4  | 1 |    | 5  | 1 |    | 2176.5017 | 2176.5011 | 0.0005  |
| 5  | 1 |    | 6  | 1 |    | 2176.4363 | 2176.4364 | -0.0001 |
| 6  | 1 |    | 7  | 1 |    | 2176.3714 | 2176.3715 | -0.0001 |
| 7  | 1 |    | 8  | 1 |    | 2176.3068 | 2176.3064 | 0.0004  |
| 2  | 1 |    | 1  | 1 |    | 2176.9482 | 2176.9489 | -0.0007 |
| 3  | 1 |    | 2  | 1 |    | 2177.0118 | 2177.0121 | -0.0003 |
| 5  | 1 |    | 4  | 1 |    | 2177.1378 | 2177.1379 | -0.0001 |
| 6  | 1 |    | 5  | 1 |    | 2177.2006 | 2177.2005 | 0.0001  |
| 7  | 1 |    | 6  | 1 |    | 2177.2630 | 2177.2630 | 0.0000  |
| 8  | 1 |    | 7  | 1 |    | 2177.3251 | 2177.3252 | -0.0001 |
| 9  | 1 |    | 8  | 1 |    | 2177.3872 | 2177.3872 | -0.0001 |
| 10 | 1 |    | 9  | 1 |    | 2177.4490 | 2177.4491 | -0.0001 |

\*\*\*\*\*

Table S6. Observed and fitted line positions of CS<sub>2</sub>-HDO (cm<sup>-1</sup>).

```

*****
J'   Ka'  Kc'   J''  Ka'' Kc''  Obs      Calc      Obs-Calc
*****
10    0   10    11    0   11   2176.2298  2176.2300  -0.0002
 9    0    9    10    0   10   2176.2984  2176.2981   0.0003
 8    0    8     9    0    9   2176.3658  2176.3659  -0.0001
 7    0    7     8    0    8   2176.4334  2176.4335  -0.0001
 6    0    6     7    0    7   2176.5012  2176.5010   0.0002
 5    0    5     6    0    6   2176.5681  2176.5682  -0.0002
 4    0    4     5    0    5   2176.6358  2176.6353   0.0005
 3    0    3     4    0    4   2176.7019  2176.7022  -0.0002
 2    0    2     3    0    3   2176.7688  2176.7688  -0.0001
 1    0    1     2    0    2   2176.8351  2176.8353  -0.0002
 0    0    0     1    0    1   2176.9015  2176.9016   0.0000
 1    0    1     0    0    0   2177.0341  2177.0336  0.0006*
 2    0    2     1    0    1   2177.0993  2177.0992   0.0000
 3    0    3     2    0    2   2177.1647  2177.1647   0.0000
 4    0    4     3    0    3   2177.2300  2177.2300   0.0000
 5    0    5     4    0    4   2177.2952  2177.2951   0.0001
 6    0    6     5    0    5   2177.3600  2177.3600   0.0000
 7    0    7     6    0    6   2177.4247  2177.4247   0.0000
 8    0    8     7    0    7   2177.4891  2177.4892   0.0000
 9    0    9     8    0    8   2177.5534  2177.5534  -0.0001
10    0   10     9    0    9   2177.6176  2177.6175   0.0001
11    0   11    10    0   10   2177.6813  2177.6814  -0.0001
12    0   12    11    0   11   2177.7451  2177.7451   0.0000
13    0   13    12    0   12   2177.8086  2177.8086   0.0000
*****

```

\*given a reduced weight in the fit.

Table S7. Observed and fitted line positions of CS<sub>2</sub>-H<sub>2</sub>O (cm<sup>-1</sup>).

Note: Blank Kc indicates an unresolved asymmetry doublet, where Calc equals the mean of the calculated doublet line positions.

```

*****
J'  Ka'  Kc'      J''  Ka''  Kc''      Obs      Calc      Obs-Calc
*****
14  1      15  1      1597.1770  1597.1764  0.0006
13  0    13  14  0    14  1597.1900  1597.1891  0.0009
13  1      14  1      1597.2457  1597.2451  0.0006
12  0    12  13  0    13  1597.2586  1597.2578  0.0007
12  1      13  1      1597.3143  1597.3139  0.0005
11  0    11  12  0    12  1597.3272  1597.3266  0.0006
11  1      12  1      1597.3826  1597.3826  0.0000
10  0    10  11  0    11  1597.3953  1597.3953  0.0000
10  1      11  1      1597.4513  1597.4513  0.0000
 9  0      10  0    10  1597.4642  1597.4641  0.0001
 9  1      10  1      1597.5202  1597.5200  0.0002
 8  0      9   9   0    9   1597.5329  1597.5328  0.0001
 8  1      9   9   1      1597.5889  1597.5887  0.0002
 7  0      8   8   0    8   1597.6017  1597.6015  0.0002
 7  1      8   8   1      1597.6572  1597.6574 -0.0002
 6  0      6   6   0    7   1597.6699  1597.6702 -0.0003
 6  1      7   7   1      1597.7260  1597.7261 -0.0001
 5  0      5   5   0    6   1597.7388  1597.7389 -0.0002
 5  1      6   6   1      1597.7948  1597.7947  0.0001
 4  0      4   4   0    5   1597.8077  1597.8076  0.0001
 4  1      5   5   1      1597.8635  1597.8634  0.0002
 3  0      3   3   0    4   1597.8763  1597.8763  0.0001
 3  1      4   4   1      1597.9321  1597.9320  0.0001
 2  0      2   2   0    3   1597.9448  1597.9449 -0.0001
 2  1      3   3   1      1598.0007  1598.0006  0.0001
 1  0      1   1   0    2   1598.0136  1598.0135  0.0000
 1  1      2   2   1      1598.0693  1598.0692  0.0001
 0  0      0   0   0    1   1598.0822  1598.0821  0.0000
 1  0      1   0   0    0   1598.2193  1598.2193  0.0000
 2  0      2   1   0    1   1598.2878  1598.2879 -0.0001
 2  1      1   1   1      1598.3435  1598.3434  0.0001
 3  0      3   2   0    2   1598.3565  1598.3564  0.0000
 3  1      2   2   1      1598.4120  1598.4119  0.0001
 4  0      4   3   0    3   1598.4249  1598.4249  0.0000
 4  1      3   3   1      1598.4803  1598.4804 -0.0001
 5  0      5   4   0    4   1598.4932  1598.4934 -0.0002
 5  1      4   4   1      1598.5488  1598.5489  0.0000
 6  0      6   5   0    5   1598.5618  1598.5619 -0.0001
 6  1      5   5   1      1598.6173  1598.6173  0.0000
 7  0      7   6   0    6   1598.6302  1598.6304 -0.0001
 7  1      6   6   1      1598.6856  1598.6857 -0.0001
 8  0      8   7   0    7   1598.6985  1598.6988 -0.0003
 8  1      7   7   1      1598.7538  1598.7541 -0.0004
 9  0      9   8   0    8   1598.7670  1598.7672 -0.0002
 9  1      8   8   1      1598.8225  1598.8225  0.0000

```

|       |   |    |    |   |    |           |           |         |
|-------|---|----|----|---|----|-----------|-----------|---------|
| 10    | 0 | 10 | 9  | 0 | 9  | 1598.8355 | 1598.8356 | -0.0001 |
| 10    | 1 |    | 9  | 1 |    | 1598.8909 | 1598.8909 | 0.0000  |
| 11    | 0 | 11 | 10 | 0 | 10 | 1598.9038 | 1598.9040 | -0.0001 |
| 11    | 1 |    | 10 | 1 |    | 1598.9591 | 1598.9592 | -0.0001 |
| 12    | 0 | 12 | 11 | 0 | 11 | 1598.9722 | 1598.9723 | -0.0001 |
| 12    | 1 | 12 | 11 | 1 | 11 | 1599.0264 | 1599.0265 | -0.0001 |
| 12    | 1 | 11 | 11 | 1 | 10 | 1599.0282 | 1599.0285 | -0.0002 |
| 13    | 0 | 13 | 12 | 0 | 12 | 1599.0403 | 1599.0406 | -0.0003 |
| 13    | 1 | 13 | 12 | 1 | 12 | 1599.0947 | 1599.0947 | 0.0000  |
| 13    | 1 | 12 | 12 | 1 | 11 | 1599.0965 | 1599.0969 | -0.0004 |
| 14    | 0 | 14 | 13 | 0 | 13 | 1599.1087 | 1599.1089 | -0.0002 |
| 14    | 1 | 14 | 13 | 1 | 13 | 1599.1626 | 1599.1628 | -0.0003 |
| 14    | 1 | 13 | 13 | 1 | 12 | 1599.1650 | 1599.1652 | -0.0003 |
| 15    | 0 | 15 | 14 | 0 | 14 | 1599.1769 | 1599.1772 | -0.0002 |
| 15    | 1 | 15 | 14 | 1 | 14 | 1599.2305 | 1599.2310 | -0.0005 |
| 15    | 1 | 14 | 14 | 1 | 13 | 1599.2334 | 1599.2336 | -0.0001 |
|       |   |    |    |   |    |           |           |         |
| 8     | 1 |    | 9  | 1 |    | 2176.4128 | 2176.4129 | -0.0001 |
| 7     | 1 |    | 8  | 1 |    | 2176.4826 | 2176.4832 | -0.0006 |
| 6     | 1 |    | 7  | 1 |    | 2176.5532 | 2176.5533 | 0.0000  |
| 5     | 1 |    | 6  | 1 |    | 2176.6230 | 2176.6231 | -0.0001 |
| 4     | 1 |    | 5  | 1 |    | 2176.6928 | 2176.6927 | 0.0001  |
| 3     | 1 |    | 4  | 1 |    | 2176.7623 | 2176.7622 | 0.0001  |
| 2     | 1 |    | 3  | 1 |    | 2176.8315 | 2176.8314 | 0.0001  |
| 1     | 1 |    | 2  | 1 |    | 2176.9004 | 2176.9004 | 0.0001  |
| 2     | 1 |    | 1  | 1 |    | 2177.1742 | 2177.1742 | 0.0000  |
| 3     | 1 |    | 2  | 1 |    | 2177.2421 | 2177.2421 | 0.0000  |
| 4     | 1 |    | 3  | 1 |    | 2177.3098 | 2177.3098 | 0.0000  |
| 5     | 1 |    | 4  | 1 |    | 2177.3773 | 2177.3772 | 0.0000  |
| 6     | 1 |    | 5  | 1 |    | 2177.4445 | 2177.4445 | 0.0000  |
| 7     | 1 |    | 6  | 1 |    | 2177.5116 | 2177.5115 | 0.0000  |
| 8     | 1 |    | 7  | 1 |    | 2177.5784 | 2177.5783 | 0.0001  |
| 9     | 1 |    | 8  | 1 |    | 2177.6450 | 2177.6449 | 0.0000  |
| 10    | 1 |    | 9  | 1 |    | 2177.7114 | 2177.7113 | 0.0001  |
| 12    | 1 |    | 11 | 1 |    | 2177.8435 | 2177.8434 | 0.0001  |
| ***** |   |    |    |   |    |           |           |         |
